# Supplementary material
Source: publisher figshare collection journal article supplement (https://frontiersin.figshare.com/ndownloader/files/14392988)
Supplement: Supplementary file 1 [file 14392988]

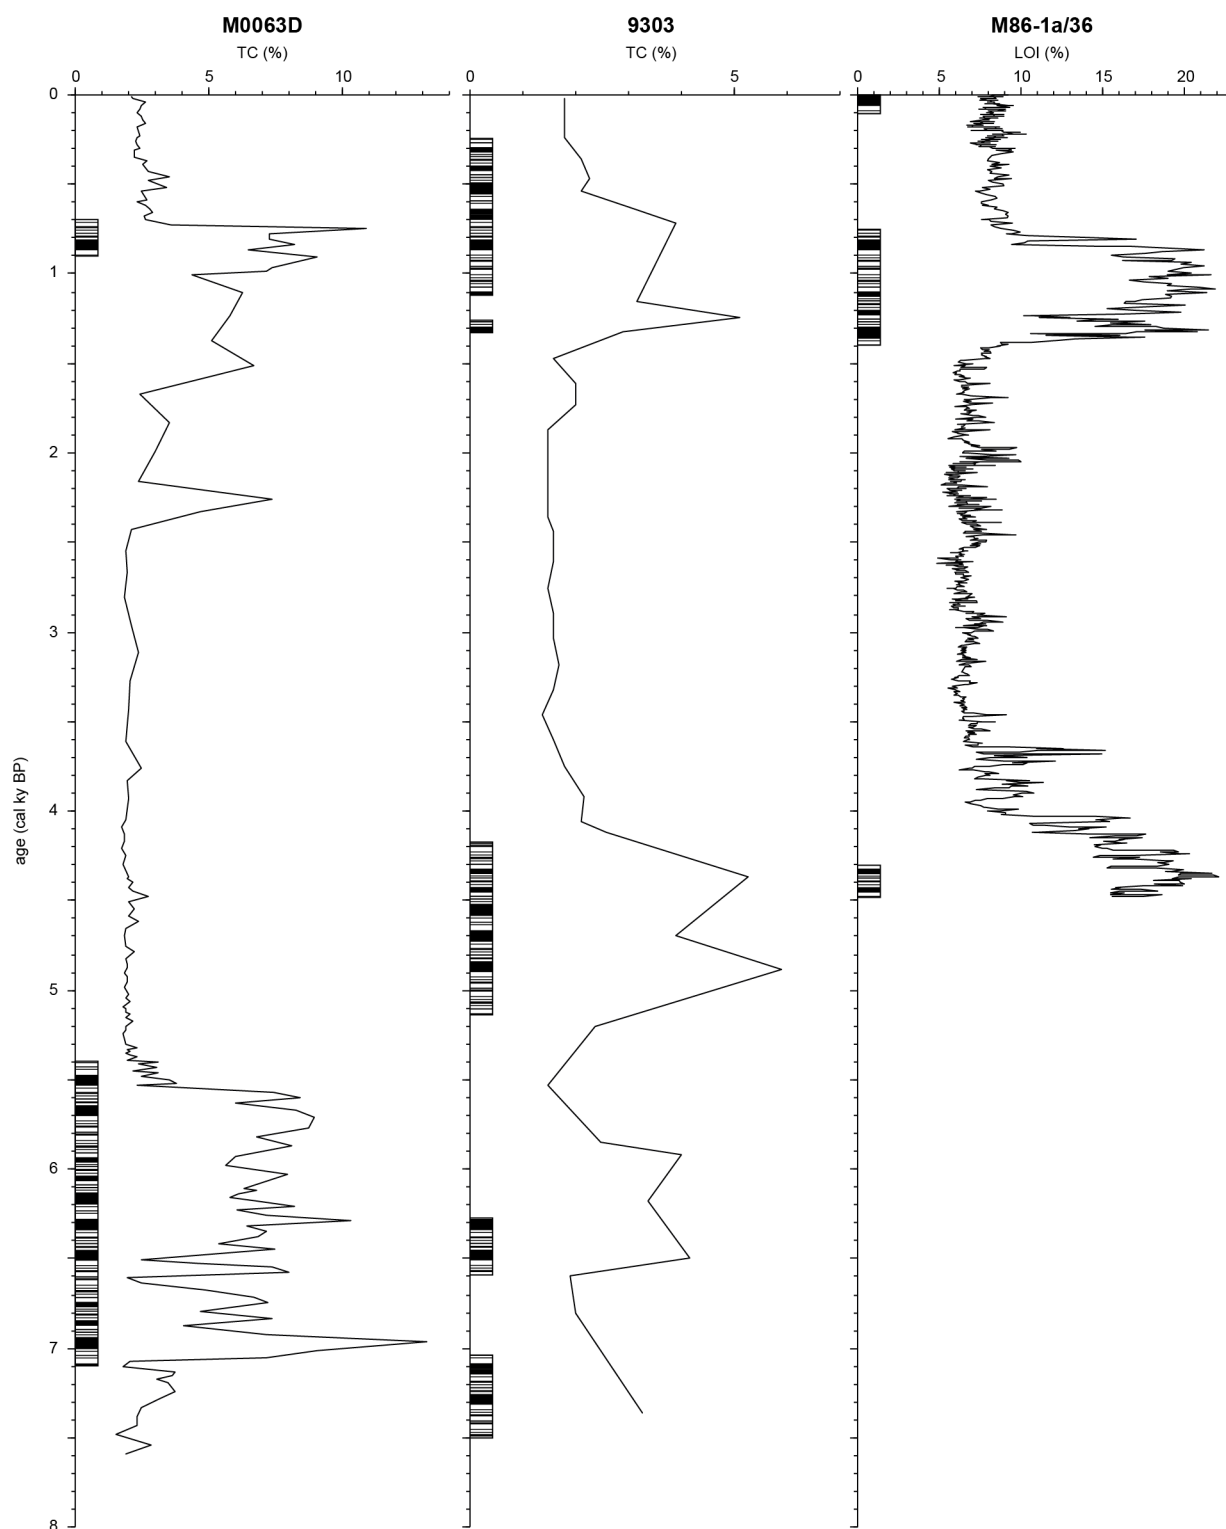

**Supplementary Figure 2.** Total carbon content (%) and prominent laminated sequences of Integrated Ocean Drilling Program Expedition 347 core M0063D (This study), core 9303 (Bianchi et al., 2000) and core M86-1a/36 (Häusler et al., 2017) plotted versus calibrated ages (cal ky BP).
